# Supplementary material
Source: ML conference proceedings conference paper supplement (https://proceedings.neurips.cc/paper_files/paper/2013/hash/83cdcec08fbf90370fcf53bdd56604ff-Abstract.html)
Supplement: Supplementary file [file 83cdcec08fbf90370fcf53bdd56604ff-Supplemental.zip]

---

# Adaptive Anonymity via $b$ -Matching

## Supplementary Material

---

### Abstract

This supplement contains all necessary detailed proofs and a worst-case theoretical analysis in support of the main article.

### 7 Proof of theorem 1

**Proof 1** *In the first iteration, the algorithm is clearly solving  $\hat{G} = \arg \min_{G \in \mathcal{G}_b} h(G)$ . Let  $G^* = \arg \min_{G \in \mathcal{G}_b} s(G)$ . Clearly, the number of stars is less than the Hamming distance  $s(G) \leq h(G)$  for any  $G$ . Since  $\hat{G}$  is the minimizer of  $h(G)$ , we have  $h(\hat{G}) \leq h(G^*)$ . Furthermore, it is easy to show for  $\delta$ -regular graphs that  $h(G) \leq \delta s(G)$ . Combining yields  $s(\hat{G}) \leq h(\hat{G}) \leq h(G^*) \leq \delta s(G^*) = \delta \min_{G \in \mathcal{G}_b} s(G)$ .*

### 8 Proof of theorem 2

**Proof 2** *Create an  $\varepsilon$ -approximation  $\tilde{s}(G)$  to  $s(G)$  by adding a tiny  $\varepsilon > 0$  to each term in the product*

$$\begin{aligned} \tilde{s}(G) &= nd - \exp \ln \sum_{ik} \frac{\mathbf{W}_{ik}}{\mathbf{W}_{ik}} \prod_j (1 + \varepsilon - \mathbf{G}_{ij}(\mathbf{X}_{ik} \neq \mathbf{X}_{jk})) \\ &\leq nd - e^{\sum_{ijk} \mathbf{W}_{ik} (\mathbf{G}_{ij}(\mathbf{X}_{ik} \neq \mathbf{X}_{jk}) \ln \frac{\varepsilon}{1+\varepsilon} + \ln(1+\varepsilon)) - \sum_{ik} \mathbf{W}_{ik} \ln \mathbf{W}_{ik}} \end{aligned}$$

*where we introduced a variational parameter  $\mathbf{W} \in \mathbb{Z}^{n \times d}$  s.t.  $\sum_{ik} \mathbf{W}_{ik} = 1$  and applied Jensen's inequality. The first step of the "while" loop minimizes the right hand side over  $\mathbf{G}$  while the second minimizes over  $\mathbf{W}$  (modulo a harmless scaling). Thus, the algorithm minimizes a variational upper bound on  $\tilde{s}(G)$  which cannot increase. Since the parameter  $G$  is discrete,  $\tilde{s}(G)$  must decrease with every iteration or else the algorithm terminates (converges).*

### 9 Proof of lemma 4.2

**Proof 3** *Take some perfect matching  $M_1$  in  $G(A, B)$  (it exists because of Hall's theorem). If it uses  $e$  then we are done. Assume it does not. Delete all edges from  $M_1$  from  $G(A, B)$  to obtain a  $(\delta - 1)$ -bipartite graph. Take one of its perfect matchings, say  $M_2$ . If it uses  $e$  then we are done. Otherwise delete edges from  $M_2$  and continue. At some point, some perfect matching will use  $e$  because, otherwise, we end up with an empty graph (i.e. without edges).*

### 10 Proof of lemma 4.4

**Proof 4** *Denote by  $\check{G} = G(\hat{A}, \hat{B})$  the graph obtained from  $G(A, B)$  by deleting vertices of  $M$ . Obviously it has a perfect matching, namely:  $M - C$ . In fact  $\check{G}$  is a union of complete bipartite graphs, pairwise disjoint, each with color classes of size at least  $(\delta - c)$ . Each perfect matching in  $\check{G}$  is a union of perfect matchings of those complete bipartite graphs. Denote by  $\check{G}_v$  a complete bipartite graph of  $\check{G}$  corresponding to vertex  $v$ . Then obviously for every edge  $e$  in  $\check{G}_v$  there is a perfect matching in  $\check{G}_v$  that uses  $e$ . In  $\check{G}_v$  we have at least  $(\delta - c)$  edges adjacent to  $v$  and that completes the proof.*

## 11 Proof of theorem 4.1

**Proof 5** Take perfect matching  $M$  and  $C \subseteq M$  from the statement of the theorem. For every vertex  $v \in A$ , denote by  $m(v)$  its neighbor in  $M$ . Denote:  $m(V) = \{m(v) : v \in V\}$ . Take bipartite graph  $\check{G} = G(\check{A}, \check{B})$  with color classes  $\check{A}, \check{B}$ , obtained from  $G(A, B)$  by deleting all vertices of  $C$ . For a vertex  $v \in \check{A}$  and an edge  $e$  adjacent to it in  $\check{G}$  we will say that this edge is bad with respect to  $v$  if there is no perfect matching in  $G(A, B)$  that uses  $e$  and all edges from  $C$ . We will say that a vertex  $v \in \check{A}$  is bad if there are at least  $\phi(\delta)$  edges that are bad with respect to  $v$ . Denote by  $x$  the number of bad vertices and by  $X$  the set of all bad vertices. We just need to prove that 
$$x \leq \frac{2c^3 \delta^2 n' (1 + \frac{\phi(\delta) + \sqrt{\phi^2(\delta) - 2c^2 \delta}}{2c\delta})}{\phi^3(\delta)(1 + \sqrt{1 - \frac{2c^2 \delta}{\phi^2(\delta)}})(1 - \frac{c^2}{\phi(\delta)})} + \frac{c\delta}{\phi(\delta)}.$$
 Take some bad vertex  $v$  and some edge  $e$  which is bad

with respect to it. Graph  $\check{G}$  obviously has a perfect matching, namely:  $M - C$ . However from the definition of  $e$ , it does not have a perfect matching that uses  $e$ . So the graph  $\check{G}^e = G(\check{A}^e, \check{B}^e)$  obtained from  $\check{G}$  by deleting both endpoints of  $e$  does not have a perfect matching. But, according to Hall's theorem, that means that in  $\check{G}^e$  there is a subset  $S_v^e \subseteq \check{A}^e$  such that  $|N(S_v^e)| < |S_v^e|$ , where  $N(T)$  denotes the set of neighbors of the vertices from the set  $T$ . But in  $\check{G}$  we have:  $|N(S_v^e)| \geq |S_v^e|$ . In fact we can say more:  $m(S_v^e) \subseteq N(S_v^e)$  in  $\check{G}$ . Therefore it must be the case that an edge  $e$  touches a vertex from  $m(S_v^e)$  and furthermore  $N(S_v^e) = m(S_v^e)$  in  $\check{G}$ . Whenever the set  $S \subseteq \check{A}$  satisfies:  $N(S) = m(S)$  in  $\check{G}$  we say that it is closed. So for every edge  $e$  bad with respect to a vertex  $v$  there exists closed set  $S_v^e$ . Fix some bad vertex  $v$  and some set  $E$  of its bad edges with size  $\phi(\delta)$ . Denote  $S_v^E = \bigcup_{e \in E} S_v^e$ .  $S_v^E$  is closed as a sum of closed sets. We also have:  $v \notin S_v^E$ . Besides every edge from  $E$  touches some vertex from  $m(S_v^E)$ . We say that the set  $S$  is  $\phi(\delta)$ -bad with respect to a vertex  $v \in \check{A} - S$  if it is closed and there are  $\phi(\delta)$  bad edges with respect to  $v$  that touch  $S$ . So we conclude that  $S_v^E$  is  $\phi(\delta)$ -bad with respect to  $v$ . Let  $S_v^m$  be the minimal  $\phi(\delta)$ -bad set with respect to  $v$ .

**Lemma 11.1** Let  $v_1, v_2$  be two bad vertices. If  $v_2 \in S_{v_1}^m$  then  $S_{v_2}^m \subseteq S_{v_1}^m$ .

**Proof 6** From the fact that  $S_{v_1}^m$  is closed we know  $\phi(\delta)$  bad edges adjacent to  $v_2$  and touching  $m(S_{v_1}^m)$  must also touch  $m(S_{v_1}^m)$ . So those  $\phi(\delta)$  edges also touch  $m(S_{v_2}^m \cap S_{v_1}^m)$ . Clearly the set  $T = S_{v_2}^m \cap S_{v_1}^m$  is closed as an intersection of two closed sets. So from what we know so far we can conclude that it is  $\phi(\delta)$ -bad with respect to  $v_2$ . So from the definition of  $S_{v_2}^m$  we can conclude that  $T = S_{v_2}^m$ , so  $S_{v_2}^m \subseteq S_{v_1}^m$ .

**Lemma 11.2** Denote  $P = \{S_v^m : v \in X\}$ . It is a poset with the ordering induced by the inclusion relation. Then it does not have anti-chains of size larger than  $\frac{c\delta}{\phi(\delta)}$ .

**Proof 7** Take some anti-chain  $A = \{S_{v_1}^m, \dots, S_{v_l}^m\}$  in  $P$ . From lemma 11.1 we know that the set  $v_1, \dots, v_l$  does not intersect  $R = S_{v_1}^m \cup S_{v_2}^m \dots \cup S_{v_l}^m$ . But  $R$  is closed as a sum of closed sets. Assume by contradiction that  $l > \frac{c\delta}{\phi(\delta)}$ , i.e.  $\phi(\delta)l > c\delta$ . Now consider the set  $D = m(R)$ . We will count the number of edges touching  $D$  in  $G(A, B)$ . On the one hand from the fact that  $G(A, B)$  is  $\delta$ -regular we know that this number is exactly  $l\delta$ . On the other hand we have at least  $\phi(\delta)l$  edges ( $\phi(\delta)$  bad edges from every  $v_i : i = 1, 2, \dots, l$ ) touching  $D$ . Besides from the fact that  $R$  is closed we know that there are at least  $l\delta - c\delta$  edges such that each of them is adjacent to some vertex from  $R$  and from  $m(R)$  (for every vertex from  $R$  we have  $\delta$  edges in  $G(A, B)$  adjacent to it and all but the edges adjacent to some vertices from  $C$  must touch  $D$ ; altogether we have at most  $c\delta$  edges such that each of them is adjacent to some vertex from  $C$  and some vertex from  $R$ ). So summing all those edges we get more than  $\delta l$  edges which is a contradiction.

**Corollary 11.1** Using Dillworth's lemma about chains and anti-chains in posets and lemma 11.2, we see that the set  $P = \{S_v^m : v \in X\}$  has a chain of length at least  $\frac{x\phi(\delta)}{c\delta}$ .

Now take an arbitrary chain of  $P = \{S_{v_i}^m : v \in X\}$  of length at least  $\frac{x\phi(\delta)}{c\delta}$ . Denote  $L = \{S_{v_1}^m, \dots, S_{v_d}^m\}$ , where  $S_{v_1}^m \subseteq S_{v_2}^m \subseteq \dots \subseteq S_{v_d}^m$ . So we have  $d \geq \frac{x\phi(\delta)}{c\delta}$ . Denote:  $X_i = S_{v_{i+1}}^m - S_{v_i}^m$  for

$i = 1, 2, \dots, d-1$ . Assume that  $|X_i| \geq (\xi + 1)$ . Then  $X_i$  contains at least  $\xi$  vertices different than  $v_i$ . Call this set of vertices  $C_i$ . At least one vertex from  $C_i$  must have at most  $(\frac{c\delta - \phi(\delta)}{\xi})$  edges adjacent to it and touching  $m(S_{v_i}^m)$ . Assume not and count the number of edges of  $G(A, B)$  with one endpoint in  $m(S_{v_i}^m)$ . Then we have more than  $\xi \frac{c\delta - \phi(\delta)}{\xi}$  such edges adjacent to vertices from  $C_i$ . Moreover, there are at least  $\phi(\delta)$  bad edges adjacent to vertex  $v_i$ . Finally we have at least  $\delta |S_{v_i}^m| - c\delta$  edges like that adjacent to vertices from  $S_{v_i}^m$  (the analysis of this last expression is the same as in lemma 11.2). So altogether we have more than  $\delta |S_{v_i}^m|$  which is impossible because  $G(A, B)$  is  $\delta$ -regular. So we can conclude that if  $|X_i| \geq (\xi + 1)$  then  $X_i$  contains vertex  $x_i$  with at most  $(\frac{c\delta - \phi(\delta)}{\xi})$  edges adjacent to it and touching  $m(S_{v_i}^m)$ . So there are at least  $\delta - \frac{c\delta - \phi(\delta)}{\xi}$  edges adjacent to  $x_i$  with second endpoints in  $B - m(S_{v_i}^m)$ . But we also know that  $x_i \in S_{v_{i+1}}^m$  and the set  $S_{v_{i+1}}^m$  is closed. So at least  $\delta - \frac{c\delta - \phi(\delta)}{\xi} - c$  edges adjacent to  $x_i$  have second endpoints in  $m(S_{v_{i+1}}^m - S_{v_i}^m) = m(X_i)$ . But that means that  $|m(X_i)| \geq \delta - \frac{c\delta - \phi(\delta)}{\xi} - c$ , so  $|X_i| \geq \delta - \frac{c\delta - \phi(\delta)}{\xi} - c$ . So we can conclude that if  $|X_i| \geq (\xi + 1)$  then  $X_i \geq \delta - \frac{c\delta - \phi(\delta)}{\xi} - c$ . Let's now analyze how many consecutive sets  $X_i$  may satisfy  $|X_i| \leq \xi$ . Assume that sets  $X_{i+1}, \dots, X_{i+l}$  all have size at most  $\xi$ . Consider vertices  $v_{i+1}, v_{i+2}, \dots, v_{i+j}$  and the sets of bad edges  $E(v_{i+j})$  related to  $v_{i+j}$  and  $S_{v_{i+j}}^m$  for  $1 \leq j \leq l$ . We have:  $|E(v_{i+j})| \geq \phi(\delta)$ . We will count the number of edges in  $G(A, B)$  that touch  $m(S_{v_i}^m)$ . All edges from  $E(v_{i+1})$  satisfy this condition. At least  $E(v_{i+2}) - |X_i|$  from  $E(v_{i+2})$  satisfy it, at least  $E(v_{i+3}) - |X_i| - |X_{i+1}|$  edges from  $E(v_{i+3})$ , etc. So we have at least  $l\phi(\delta) - \xi - 2\xi - \dots - (l-1)\xi$  edges from  $\bigcup_{j=1}^l E(v_{i+j})$  satisfying this condition. Furthermore we have at least  $\delta |S_{v_i}^m| - c\delta$  other edges satisfying it (with one endpoint in  $S_{v_i}^m$ ). Because altogether we can't have more than  $\delta |S_{v_i}^m|$  edges satisfying the condition, we must have:  $l\phi(\delta) - \xi - 2\xi - \dots - (l-1)\xi \leq c\delta$ . Note that  $\xi \geq c$ . So we have in particular:  $l\phi(\delta) - \frac{\xi l^2}{2} \leq \xi\delta$ . Solving this quadratic equation we obtain:  $l \leq \frac{\phi(\delta) - \sqrt{\phi^2(\delta) - 2\xi^2\delta}}{\xi}$  or  $l \geq \frac{\phi(\delta) + \sqrt{\phi^2(\delta) - 2\xi^2\delta}}{\xi}$ . Now assume that we have more than  $\frac{\phi(\delta) - \sqrt{\phi^2(\delta) - 2\xi^2\delta}}{\xi}$  consecutive  $X_i$  of size at most  $\xi$ . Then let  $r$  be the smallest integer greater than  $\frac{\phi(\delta) - \sqrt{\phi^2(\delta) - 2\xi^2\delta}}{\xi}$ . Take  $r$  consecutive sets:  $X_{i+1}, \dots, X_{i+r}$ . Then it's easy to check that the condition  $\phi(\delta) > \xi\sqrt{2\delta + \frac{1}{4}}$  implies that we have:  $\phi(\delta) - \sqrt{\phi^2(\delta) - 2\xi^2\delta} < \xi r < \phi(\delta) + \sqrt{\phi^2(\delta) - 2\xi^2\delta}$ . But this is a contradiction according to what we have said so far. Therefore we must have:  $l \leq l_0$ , where  $l_0 = \frac{\phi(\delta) - \sqrt{\phi^2(\delta) - 2\xi^2\delta}}{\xi}$ . But that means that in the set:  $\{X_1, X_2, \dots, X_{d-1}\}$  we have at least  $\frac{d-1}{l_0+1}$  sets of size at least  $\delta - \frac{c\delta - \phi(\delta)}{\xi} - c$ . Sets  $X_i$  are pairwise disjoint and are taken from the set of size  $n' = n - c$ . Therefore we have:  $\frac{d-1}{l_0+1}(\delta - \frac{c\delta - \phi(\delta)}{\xi} - c) \leq n'$ . So we have:  $d \leq \frac{n'(l_0+1)}{\delta - \frac{c\delta - \phi(\delta)}{\xi} - c} + 1$ . But then using the inequality  $d \geq \frac{x\phi(\delta)}{c\delta}$  and substituting in the expression for  $l_0$  we complete the proof of the theorem.

## 12 Proof of lemma 4.5

**Proof 8** Take canonical matching  $M = \{(a_1, b_1), \dots, (a_n, b_n)\}$  of  $G(A, B)$ . Without loss of generality assume that the adversary knows the edges:  $\{(a_1, b_1), \dots, (a_c, b_c)\}$ . Write  $C = \{(a_1, b_1), \dots, (a_c, b_c)\}$  and  $m(a_i) = b_i$ , for  $i = 1, 2, \dots, n$ . Denote the degree of a vertex  $a_i$  in  $G(A, B)$  as  $\delta_i$  for  $i = 1, 2, \dots, n$ . Note that from our assumption about the bipartite graph we know that the degree of a vertex  $b_i$  is also  $\delta_i$  for  $i = 1, 2, \dots, n$ . For a subset  $S \subseteq A$  denote  $m(S) = \{m(v) : v \in S\}$ . Take vertex  $v = a_i$  for  $i > c$ . An edge  $e$  non-incident with edges from  $C$ , but incident with  $v$  is a good edge if there exists a perfect matching in  $G(A, B)$  that uses  $e$  such that  $C$  is its sub-matching. It suffices to prove that for any fixed  $v = a_i$  for  $i > c$  every edge  $e$  non-incident with edges from  $C$ , but incident with  $v$  is a good edge. Assume by contradiction that this is not the case. Denote by  $\check{G}(A, B)$  the graph obtained from  $G(A, B)$  by deleting edges of  $C$ . For a subset  $S \subseteq A$  we will denote by  $N(S)$  the set of neighbors of the vertices of  $S$  in  $\check{G}(A, B)$ . Graph  $\check{G}(A, B)$  obviously has a perfect matching (a sub-matching of the perfect matching of  $G(A, B)$ ). Our assumption on  $e$  let's us deduce that, if we exclude from  $\check{G}(A, B)$  an edge  $e$  together with its

endpoints, then the graph obtained in such a way does not have a perfect matching. So, using Hall's theorem we can conclude that there exists  $S_v^e \subseteq A$  such that  $v \notin S_v^e$  and, furthermore, the following two statements hold: [ $e$  is incident with some vertex from  $m(S_v^e)$ ] and [ $N(S_v^e) \subseteq m(S_v^e)$ ].

Without loss of generality write  $S_v^e = \{a_{c+1}, \dots, a_{c+l}\}$  for some  $l > 0$ . Write  $\Delta = \sum_{i=1}^l \delta_{c+i}$ . Consider a fixed vertex  $a_{c+i}$  for  $i = 1, \dots, l$ . Denote by  $\mathcal{F}_i$  the set of the vertices of  $m(S_v^e)$  adjacent to it and by  $\mathcal{G}_i$  the set of the vertices from the set  $\{b_1, \dots, b_c\}$  adjacent to it. Denote by  $\mathcal{D}_i$  the set of the neighbors of  $a_{c+i}$  in  $G(A, B)$ . Note first that  $\mathcal{D}_{c+i} = \mathcal{F}_i \cup \mathcal{G}_i$  for  $i = 1, \dots, l$ . Otherwise there would exist a vertex in  $S_v^e$  adjacent to some vertex  $x \notin m(S_v^e)$  of  $G(A, B)$ . But that contradicts the fact that  $N(S_v^e) \subseteq m(S_v^e)$ . For a vertex  $b_j \in \mathcal{G}_i$  we call a vertex  $a_j$  a reverse of  $b_j$  with respect to  $i$ . Note that by symmetry  $(a_j, b_{c+i})$  is an edge of  $G(A, B)$ . For a given vertex  $a_{c+i}$  for  $i = 1, 2, \dots, l$  write  $Rev_i = \{(a_j, b_{c+i}) : b_j \in \mathcal{G}_i\}$ . Note that the sets  $Rev_1, \dots, Rev(l)$  are pairwise disjoint and besides  $|Rev_1 \cup \dots \cup Rev_l| = \sum_{i=1}^l |\mathcal{G}_i|$ . Therefore we can conclude that there are at least  $\sum_{i=1}^l |\mathcal{G}_i| + \sum_{i=1}^l |\mathcal{F}_i|$  edges nonadjacent to  $v$  and with one endpoint in the set  $m(S_v^e)$ . Thus, from the fact that  $\mathcal{D}_{c+i} = \mathcal{F}_i \cup \mathcal{G}_i$  for  $i = 1, 2, \dots, l$ , we can conclude that there are at least  $\sum_{i=1}^l |\mathcal{D}_{c+i}|$  edges nonadjacent to  $v$  and with one endpoint in the set  $m(S_v^e)$ . Since an edge  $e$  has also an endpoint in  $m(S_v^e)$ , we can conclude that altogether there are at least  $\Delta + 1$  edges in  $G(A, B)$  with one endpoint in the set  $m(S_v^e)$ . But this completes the proof since it contradicts the definition of  $\Delta$ .

### 13 Appendix - worst case example of asymmetric matching

We here illustrate a worst-case type analysis for the asymmetric regular graph setting.

One can ask whether it is possible to prove some reasonable  $k$ -anonymity in the asymmetric case (the general  $\delta$ -regular asymmetric bipartite graphs) for every person, rather than the *all-but-at-most* guarantee of theorem 4.1? The answer is - no. In fact we can claim more. For every  $\delta$  there exist  $\delta$ -regular bipartite graphs  $G(A, B)$  with the following property: *there exists an edge  $e$  of some perfect matching  $M$  in  $G(A, B)$  and a vertex  $w \in A$  nonadjacent to  $e$  such that in every perfect matching  $M'$  in  $G(A, B)$  that uses  $e$ , vertex  $w$  is adjacent to an edge from  $M$ .*

So, in other words, it is possible that if the adversary is lucky and knows in advance a complete record of one person then he will reveal with probability 1 a complete record of some other person. Thus, those types of persons do not have much privacy. Fortunately, theorem 4.1 says that if the publisher chooses the parameters of a  $\delta$ -regular bipartite graph he creates carefully then there will only be a *tiny fraction* of persons like that. We next show constructions of asymmetric  $\delta$ -regular bipartite graphs for which the adversary, if given information about one specific edge of the matching in advance, can find another edge of the matching with probability 1.

For a fixed  $\delta$  our constructed graph  $G(A, B)$  will consist of color classes of sizes  $\delta^2 + 1$  each. The graph  $G(A, B)$  is the union of  $\delta + 2$  bipartite subgraphs and some extra edges added between these graphs. The subgraphs are:

- subgraphs  $F_i : i = 1, 2, \dots, (\delta - 1)$ , where each  $F_i$  is a complete bipartite graph with one color class of size  $\delta$  (the one from  $A$ ) and one color class of size  $(\delta - 1)$  (the one from  $B$ ). We denote the set of vertices of  $F_i$  from  $A$  as  $\{u_1^i, \dots, u_\delta^i\}$  and from  $B$  as  $\{d_1^i, \dots, d_{\delta-1}^i\}$
- bipartite subgraph  $B_1$  of two adjacent vertices:  $x \in A, y \in B$
- bipartite subgraph  $B_2$  with vertex  $z \in A$  and  $k$  vertices from  $B$  adjacent to it, namely  $\{r_0, r_1, \dots, r_{\delta-1}\}$
- complete  $(\delta - 1)$ -regular bipartite subgraph  $B_3$  with color classes  $\{w_1, \dots, w_{\delta-1}\} \subseteq A$  and  $\{v_1, \dots, v_{\delta-1}\} \subseteq B$

with edges between the above  $\delta + 2$  subgraphs as follows:

- $(y, u_1^i)$  for  $i = 1, 2, \dots, \delta - 1$
- $(r_{\delta-i}, u_j^i)$  for  $i = 1, 2, \dots, (\delta - 1); j = 2, 3, \dots, \delta$
- $(x, v_i)$  for  $i = 1, 2, \dots, \delta - 1$
- $(r_0, w_i)$  for  $i = 1, 2, \dots, \delta - 1$ .

Consider when an adversary attacks the above constructed graph  $G(A, B)$  after knowing one edge in advance. It is enough to prove that any matching in  $G(A, B)$  that uses  $(x, y)$  must also use  $(z, r_0)$ . So assume by contradiction that there is a matching  $M$  in  $G(A, B)$  that uses both  $(x, y)$  and  $(z, r_{\delta-i})$  for some  $i \in \{1, 2, \dots, \delta - 1\}$ . Denote by  $\dot{G}(A, B)$  the graph obtained from  $G(A, B)$  by deleting  $x, y, z, r_{\delta-i}$ . This graph must have a perfect matching. However it does not satisfy Hall's condition. The condition is not satisfied by the set  $\{u_1^i, \dots, u_\delta^i\}$  because one can easily check that in  $\dot{G}(A, B)$  we have:  $N(\{u_1^i, \dots, u_\delta^i\}) = \{d_1^i, \dots, d_{\delta-1}^i\}$ . That completes the proof.
